# Supplementary material for: Coordinating a Team Response to Behavioral Emergencies in the Emergency Department: A Simulation-Enhanced Interprofessional Curriculum
Source: PubMed Central journal article supplement (PMC4651583; doi:10.5811/westjem.2015.8.26220), 2015-10-22
Supplement: wjem-16-859-s001.pdf [file wjem-16-859-s001.pdf]

**The Management of Aggression and Violence Attitude Scale (MAVAS)**

- The purpose of this questionnaire is to obtain your perceptions of aggression and the management of aggression at this facility.
- For each item, please darken the circle that reflects your opinion about the statement. For example:
- If you wish to change your rating, place an X completely through the circle and then darken another circle.
- This is an anonymous survey. Do not write your name on this form.
- The questionnaire contains 30 items and takes about 10 minutes to complete.

|    |                                                                                       | <u>Strongly Agree</u> | <u>Agree</u>          | <u>Disagree</u>       | <u>Strongly Disagree</u> |
|----|---------------------------------------------------------------------------------------|-----------------------|-----------------------|-----------------------|--------------------------|
| 1  | Patients are aggressive because of the environment they are in.                       | <input type="radio"/> | <input type="radio"/> | <input type="radio"/> | <input type="radio"/>    |
| 2  | Other people make patients aggressive or violent.                                     | <input type="radio"/> | <input type="radio"/> | <input type="radio"/> | <input type="radio"/>    |
| 3  | Patients commonly become aggressive because staff do not listen to them.              | <input type="radio"/> | <input type="radio"/> | <input type="radio"/> | <input type="radio"/>    |
| 4  | Gender mix on the wards is important in the management of aggression.                 | <input type="radio"/> | <input type="radio"/> | <input type="radio"/> | <input type="radio"/>    |
| 5  | It is difficult to prevent patients from becoming violent or aggressive.              | <input type="radio"/> | <input type="radio"/> | <input type="radio"/> | <input type="radio"/>    |
| 6  | Patients from particular cultural groups are more prone to aggression.                | <input type="radio"/> | <input type="radio"/> | <input type="radio"/> | <input type="radio"/>    |
| 7  | Patients are aggressive because they are ill.                                         | <input type="radio"/> | <input type="radio"/> | <input type="radio"/> | <input type="radio"/>    |
| 8  | Poor communication between staff and patients leads to patient aggression.            | <input type="radio"/> | <input type="radio"/> | <input type="radio"/> | <input type="radio"/>    |
| 9  | There appear to be types of patients who frequently become aggressive towards staff.  | <input type="radio"/> | <input type="radio"/> | <input type="radio"/> | <input type="radio"/>    |
| 10 | Cultural misunderstandings between patients and staff can lead to aggression.         | <input type="radio"/> | <input type="radio"/> | <input type="radio"/> | <input type="radio"/>    |
| 11 | Different approaches are used on this ward to manage patient aggression and violence. | <input type="radio"/> | <input type="radio"/> | <input type="radio"/> | <input type="radio"/>    |
| 12 | Patients who are aggressive towards staff should try to control their feelings.       | <input type="radio"/> | <input type="radio"/> | <input type="radio"/> | <input type="radio"/>    |
| 13 | When a patient is violent, seclusion is one of the most effective approaches to use.  | <input type="radio"/> | <input type="radio"/> | <input type="radio"/> | <input type="radio"/>    |
| 14 | Patients who are violent are often restrained for their own safety.                   | <input type="radio"/> | <input type="radio"/> | <input type="radio"/> | <input type="radio"/>    |
| 15 | The practice of secluding violent patients should be discontinued.                    | <input type="radio"/> | <input type="radio"/> | <input type="radio"/> | <input type="radio"/>    |

CODE ID: \_\_\_\_\_

CIRCLE: PRE POST

|    |                                                                                                                           | <u>Strongly Agree</u> | <u>Agree</u>          | <u>Disagree</u>       | <u>Strongly Disagree</u> |
|----|---------------------------------------------------------------------------------------------------------------------------|-----------------------|-----------------------|-----------------------|--------------------------|
| 16 | Medication is a valuable approach for treating aggressive and violent behaviour.                                          | <input type="radio"/> | <input type="radio"/> | <input type="radio"/> | <input type="radio"/>    |
| 17 | Aggressive patients will calm down automatically if left alone.                                                           | <input type="radio"/> | <input type="radio"/> | <input type="radio"/> | <input type="radio"/>    |
| 18 | The use of negotiation could be used more effectively when managing aggression and violence.                              | <input type="radio"/> | <input type="radio"/> | <input type="radio"/> | <input type="radio"/>    |
| 19 | Restrictive care environments can contribute towards patient aggression and violence.                                     | <input type="radio"/> | <input type="radio"/> | <input type="radio"/> | <input type="radio"/>    |
| 20 | Expressions of aggression do not always require staff intervention.                                                       | <input type="radio"/> | <input type="radio"/> | <input type="radio"/> | <input type="radio"/>    |
| 21 | Physical restraint is sometimes used more than necessary.                                                                 | <input type="radio"/> | <input type="radio"/> | <input type="radio"/> | <input type="radio"/>    |
| 22 | Alternatives to the use of containment and sedation to manage patient violence could be used more frequently.             | <input type="radio"/> | <input type="radio"/> | <input type="radio"/> | <input type="radio"/>    |
| 23 | Improved one to one relationships between staff and patients can reduce the incidence of patient aggression and violence. | <input type="radio"/> | <input type="radio"/> | <input type="radio"/> | <input type="radio"/>    |
| 24 | Patient aggression could be handled more effectively on this ward.                                                        | <input type="radio"/> | <input type="radio"/> | <input type="radio"/> | <input type="radio"/>    |
| 25 | Prescribed medication can in some instances lead to patient aggression and violence.                                      | <input type="radio"/> | <input type="radio"/> | <input type="radio"/> | <input type="radio"/>    |
| 26 | It is largely situations that contribute towards the expression of aggression by patients.                                | <input type="radio"/> | <input type="radio"/> | <input type="radio"/> | <input type="radio"/>    |
| 27 | Seclusion is sometimes used more than necessary.                                                                          | <input type="radio"/> | <input type="radio"/> | <input type="radio"/> | <input type="radio"/>    |
| 28 | Prescribed medication should be used more frequently to help patients who are aggressive and violent.                     | <input type="radio"/> | <input type="radio"/> | <input type="radio"/> | <input type="radio"/>    |
| 29 | The use of de-escalation is successful in preventing violence.                                                            | <input type="radio"/> | <input type="radio"/> | <input type="radio"/> | <input type="radio"/>    |
| 30 | If the physical environment were different, patients would be less aggressive.                                            | <input type="radio"/> | <input type="radio"/> | <input type="radio"/> | <input type="radio"/>    |

**Role:**

- Ancillary staff
- Nurse
- Physician
- Hospital Police

**Gender:**

- Male
- Female

**Age Group:**

- 20 or under
- 21 to 25
- 26 to 30
- 31 to 35
- 36 to 40
- 41 to 45
- 46 to 50
- 51 to 55
- 56 or older

Thank you for completing this survey.

**MAVAS Sub Scales (for internal use only)**

| <b><u>Internal</u></b> | <b>Score (mm or cm)</b> |
|------------------------|-------------------------|
| Q4                     | -----                   |
| Q5                     | -----                   |
| Q7                     | -----                   |
| Q9                     | -----                   |
| Q14                    | -----                   |
| Q17                    | -----                   |
| <b>Total</b>           | -----                   |

| <b><u>External</u></b> | <b>Score</b> |
|------------------------|--------------|
| Q1                     | -----        |
| Q16                    | -----        |
| Q27                    | -----        |
| Q24                    | -----        |
| Q25                    | -----        |
| Q26                    | -----        |
| <b>Total</b>           | -----        |

| <b><u>Situational/Interactional</u></b> | <b>Score</b> |
|-----------------------------------------|--------------|
| Q2                                      | -----        |
| Q3                                      | -----        |
| Q6                                      | -----        |
| Q15                                     | -----        |
| Q20                                     | -----        |
| Q21                                     | -----        |
| Q22                                     | -----        |
| Q23                                     | -----        |
| <b>Total</b>                            | -----        |

| <b><u>Management</u></b> | <b>Score</b> |
|--------------------------|--------------|
| Q8                       | -----        |
| Q10                      | -----        |
| Q11                      | -----        |
| Q12                      | -----        |
| Q13                      | -----        |
| Q18                      | -----        |
| Q19                      | -----        |
| <b>Total</b>             | -----        |
